# Supplementary material
Source: MDPI journal article supplement (https://www.mdpi.com/2073-4344/10/6/718)
Supplement: s1 [file s1]

# Asymmetry in Charge Transfer Pathways Caused by Pigment-protein Interactions in the Photosystem II Reaction Center Complex

– Supplementary Material –

Yoshihiro Sato\* and Danielle Sicotte  
Department of Physics, Gettysburg College,  
Gettysburg, PA 17325, U.S.A.  
\*email: [ysato@gettysburg.edu](mailto:ysato@gettysburg.edu)

## S.1. Primary Charge Transfer States

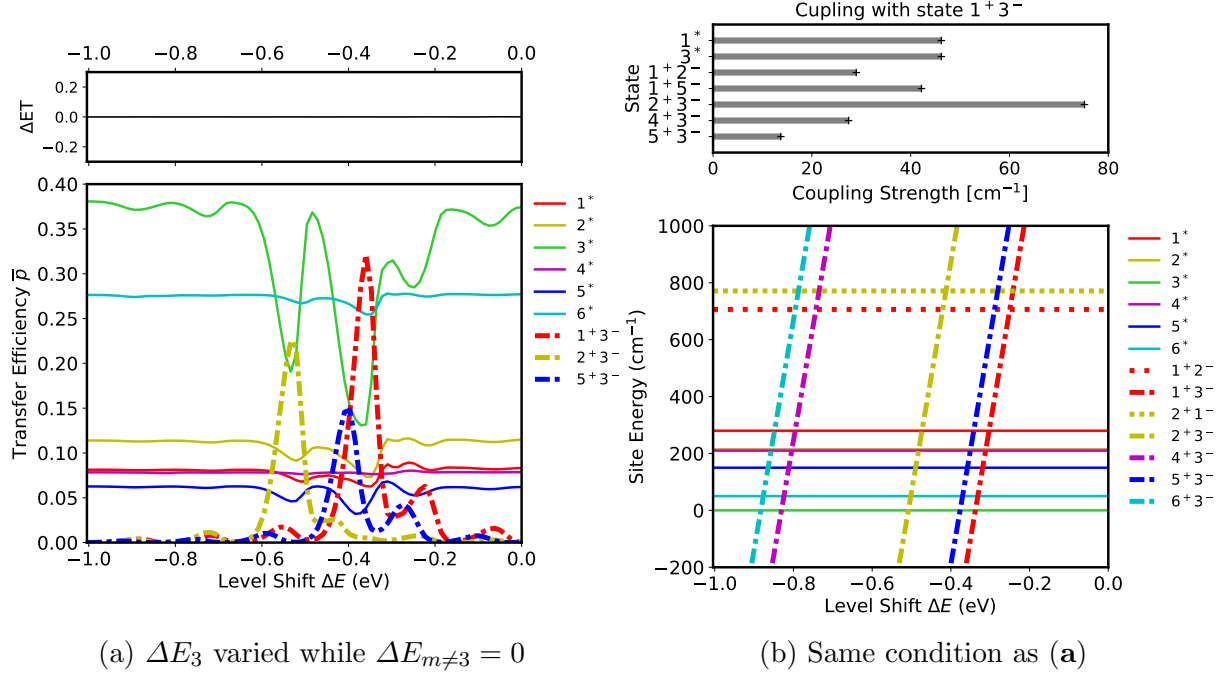

Figure S1: Transfer efficiencies, site energy change, and coupling strength. **(a)** Transfer efficiencies and  $\Delta ET$  have been computed with  $\tau = 1$  ps and  $T = 77$  K for a range of level shifts at  $\text{Chl}_{\text{D1}}$ , that is  $\Delta E_3$ . The level shift at all other pigments is zero as  $\Delta E_{m \neq 3} = 0$ . CT states of less than 0.02 transfer efficiencies are not displayed. In contrast with Fig. 7,  $\Delta ET$  does not change from zero because none of the active CT states involves  $\text{Pheo}_{\text{D1}}^-$  or  $\text{Pheo}_{\text{D2}}^-$ . **(b)** The site energies  $\varepsilon_{mn}$  are shown for the values of  $\Delta E_3$ . The top panel shows the major states coupled with  $|1^{+3-}\rangle$ , extracted from Fig. 5b for those above  $10 \text{ cm}^{-1}$ .

## S.2. The second CT pathway, $\text{FEs} \rightarrow |3^+5^- \rangle \rightarrow |1^+5^- \rangle$

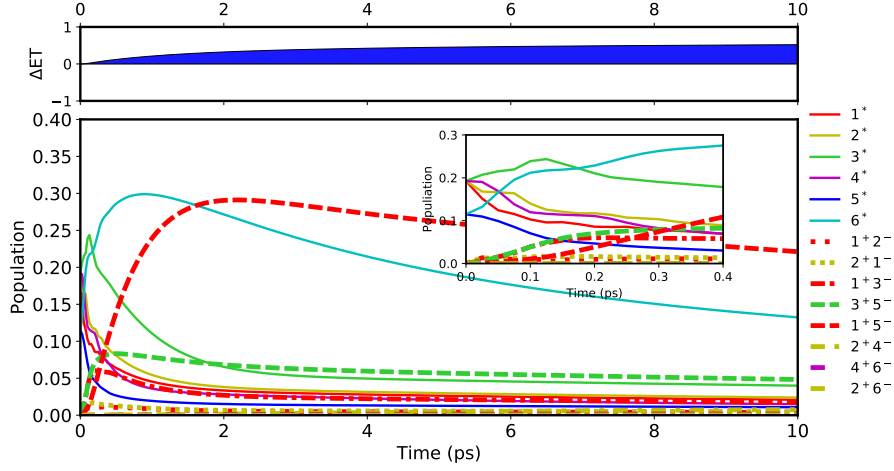

(a)  $T = 77 \text{ K}$

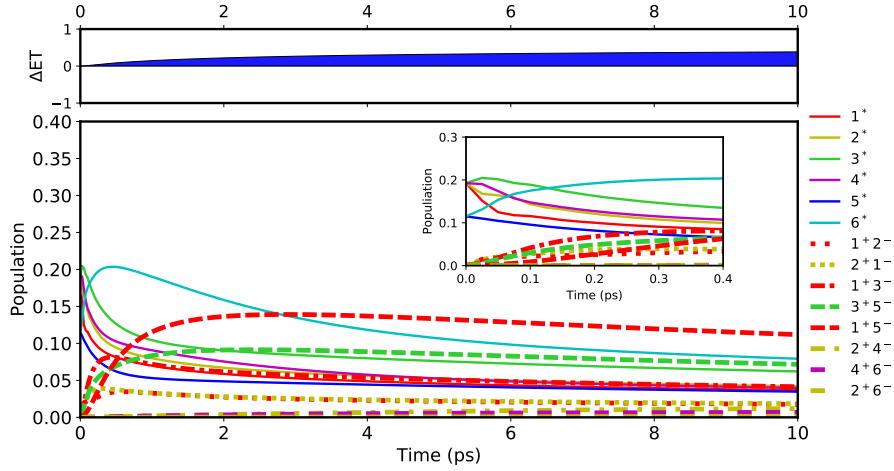

(b)  $T = 300 \text{ K}$

Figure S2: Population and  $\Delta\text{ET}$  dynamics of FE and CT states for the CT pathway of  $\text{FEs} \rightarrow |3^+5^- \rangle \rightarrow |1^+5^- \rangle$ . Out of the 36 states used for computations, only the 14 selected states are displayed for clarity. The levels shifts are set to  $\Delta E_3 = -2600 \text{ cm}^{-1}$ ,  $\Delta E_5 = -6000 \text{ cm}^{-1}$ , and  $\Delta E_2 = \Delta E_4 = \Delta E_6 = 0$ .  $\Delta\text{ET}$  at each moment of time  $t$  has been computed by setting  $\tau = t$  in Eq. 7. The insets show the populations for the first 400 fs. (a) Results for 77 K. (b) Results for 300 K.

### S.3. Primary and secondary CT states in D2

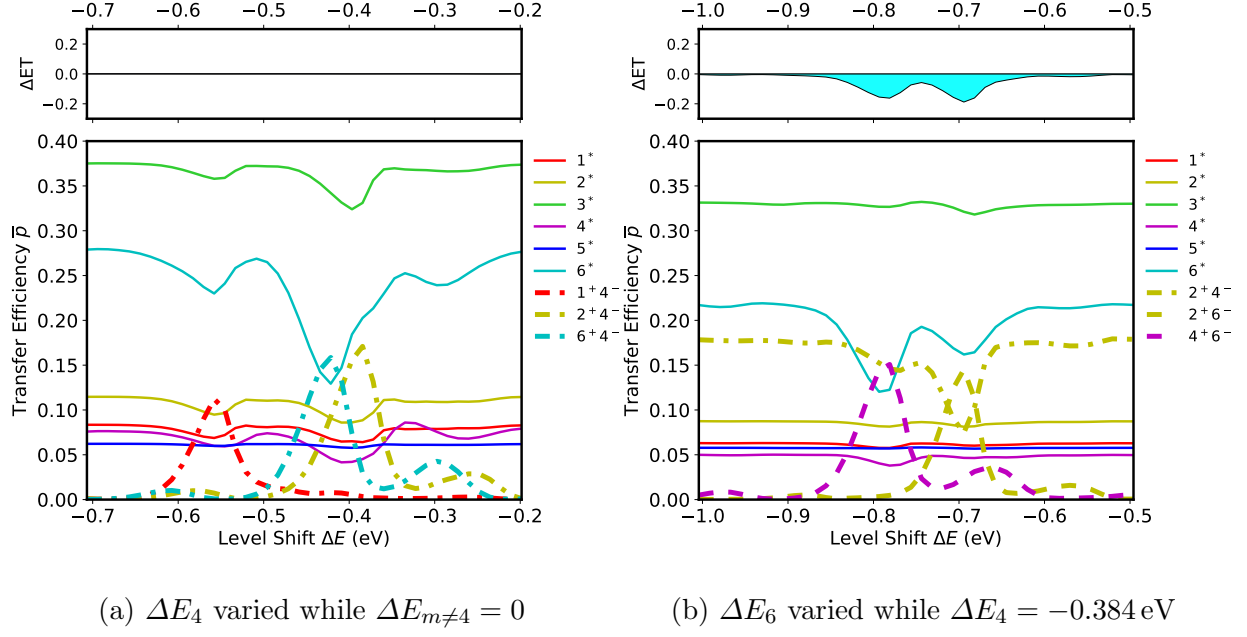

Figure S3: Transfer efficiencies and  $\Delta ET$  with  $\tau = 1 \text{ ps}$  at  $T = 77 \text{ K}$ . CT states with transfer efficiencies less than 0.02 are not shown.  $\Delta E_m = 0$  for  $m = 2, 3, 5$ . (a) The level shift  $\Delta E_4$  varied while  $\Delta E_{m \neq 4} = 0$ . (b) The level shift  $\Delta E_6$  varied while  $\Delta E_4 = -3100 \text{ cm}^{-1}$ .
